1           **Single-cell RNA sequencing reveals micro-evolution of the stickleback immune system**

2                               Lauren E. Fuess<sup>1,2,\*</sup> & Daniel I. Bolnick<sup>2</sup>

3  
4  
5  
6  
7  
8  
9  
10  
11  
12  
13  
14  
15  
16  
17  
18  
19  
20  
21  
22  
23  
24  
25  
26  
27  
28  
29  
30  
31  
32  
33  
34  
35  
36  
37  
38  
39  
40  
41  
42  
43  
44  
45  
46

<sup>1</sup>Department of Biology, Texas State University, San Marcos, TX, 78666

<sup>2</sup>Department of Ecology and Evolutionary Biology, University of Connecticut, Storrs, CT, 06269

\*Corresponding author: lefuess@txstate.edu

47 **Abstract**

48 Pathogenic infection is an important driver of many ecological processes. Furthermore,  
49 variability in immune function is an important driver of differential infection outcomes. New  
50 evidence would suggest that immune variation extends to broad cellular structure of immune  
51 systems. However, variability at such broad levels is traditionally difficult to detect in non-model  
52 systems. Here we leverage single cell transcriptomic approaches to document signatures of  
53 microevolution of immune system structure in a natural system, the three-spined stickleback  
54 (*Gasterosteus aculeatus*). We sampled nine adult fish from three populations with variability in  
55 resistance to a cestode parasite, *Schistocephalus solidus*, to create the first comprehensive  
56 immune cell atlas for *G. aculeatus*. Eight major immune cell types, corresponding to major  
57 vertebrate immune cells, were identified. We were also able to document significant variation in  
58 both abundance and expression profiles of the individual immune cell types, among the three  
59 populations of fish. This variability may contribute to observed variability in parasite  
60 susceptibility. Finally, we demonstrate that identified cell type markers can be used to reinterpret  
61 traditional transcriptomic data. Combined our study demonstrates the power of single cell  
62 sequencing to not only document evolutionary phenomena (i.e. microevolution of immune cells),  
63 but also increase the power of traditional transcriptomic datasets.

64

65

## 66 Introduction

67 Pathogenic infection is a major ecological interaction that drives physiological and immune  
68 response in hosts, natural selection (4, 5), and population dynamics (6, 7). Immense natural inter-  
69 and intra-specific variation exists in organismal response to pathogens (8-10), contributing  
70 significantly disparate infection outcomes (8, 9, 12). While the consequences of variability in  
71 immunity are well documented, the underlying mechanisms which produce this variability are  
72 poorly understood. Historically, inter- and intraspecific variation in pathogenic response has  
73 been most often studied in the context of single components of the immune system (cells, genes,  
74 etc; (10, 13-16). For example, MHC II allele repertoire is significantly correlated to amphibian  
75 susceptibility to fungal pathogens; MHC heterozygosity across and within populations  
76 significantly affects pathogen resistance (17). However, recent studies have suggested that  
77 intraspecific immune variation extends beyond single components to the broad cellular structure  
78 of immune systems. Studies have documented lineage specific loss of immune cell types, as well  
79 as evolution of novel cell types in some species (18, 19). This suggests that broad scale variation  
80 in immune cell function and/or relative abundance might contribute to variation in immune  
81 responses. Still, the majority of data to this affect comes at the species level; it is unknown to  
82 what extent microevolution of immune cell identity and activity occurs within species.  
83 Understanding the extent of these processes is a necessary first step in deciphering how  
84 microevolution of immune cell types may contribute to divergence in immune response and  
85 pathogen resistance at a population level.

86 The immunological mechanisms underlying variable pathogen response and resistance  
87 remain particularly enigmatic in natural, non-model systems where most conclusions regarding  
88 differentiation in immunity are drawn from transcriptomic data generated from whole tissue  
89 samples (20, 21). While a powerful tool, traditional RNAseq studies condense any cell type  
90 heterogeneity within a sample to one data point. Thus, it is difficult to distinguish whether  
91 changes observed are reflective of regulatory changes in gene expression or shifting cell type  
92 abundance within the broader tissue. This is especially problematic when considering non-model  
93 species for which genetic markers of prominent cell types are lacking.

94 Here we leverage novel technologies in single cell RNAseq to test whether significant  
95 variation in immune cell abundance and/or function exists at the population level, potentially  
96 contributing to differentiation of immune responses. We focus our efforts on the emerging  
97 natural immunological model system, the three-spined stickleback (*Gasterosteus aculeatus*).  
98 This small fish is a tractable natural system for considering questions related to evolutionary and  
99 ecological immunology, largely due to their unique natural history. During the Pleistocene  
100 deglaciation, ancestrally anadromous populations of stickleback became trapped in newly  
101 created freshwater lakes (22). Thousands of independent lake populations have since been  
102 evolving in response to novel biotic and abiotic stimuli associated with freshwater environments  
103 for thousands of generations. This transition to freshwater exposed stickleback to many new  
104 parasites, including freshwater exclusive, cestode parasite, *Schistocephalus solidus* (23).  
105 Populations have subsequently evolved different immune traits to resist or tolerate this parasite  
106 (24). Immense variation exists between independent lake populations in susceptibility to *S.*  
107 *solidus* (25). Consequently, the *G. aculeatus*-*S. solidus* system provides a great opportunity for  
108 addressing diverse questions related to evolutionary and ecological immunity. Despite this  
109 opportunity, understanding of the broader structure of the stickleback immune system (i.e.  
110 immune cell types and functions) is limited. We conducted single cell RNA sequencing analysis  
111 to advance our understanding of immune cell repertoires and function in this important natural

112 model system. Additionally, we leveraged the unique natural history of this species to assess  
113 questions regarding the response of immune systems to selective pressure (i.e. a novel parasite).  
114 By comparing immune cell repertoires among populations of fish which are naïve,  
115 susceptible/tolerant, or resistant to the parasite we are able to demonstrate that selection can  
116 create rapid evolutionary change in not only relative immune cell abundance, but also function  
117 (i.e. gene expression) of these immune cell types. These findings add further evidence that  
118 variation in broad immune system structure contributes to functional diversity of immunity and  
119 divergence in immune responses on a micro-scale.

120

## 121 **Results & Discussion**

122

### 123 **The stickleback head kidney is comprised of eight cell types**

124 To create a description of the immune cell repertoire of the three-spined stickleback, *G.*  
125 *aculeatus*, we conducted single cell RNA sequencing and associated analysis of nine laboratory-  
126 raised adult fish. Individuals were lab-raised descendants bred from wild-caught ancestors from  
127 three different populations on Vancouver Island with variable resistance to *S. solidus* (3 fish per  
128 population). These populations include one anadromous population from Sayward Estuary,  
129 which are highly susceptible to *S. solidus* which they rarely encounter in nature. In Gosling Lake,  
130 fish are frequently infected and tolerate rapid tapeworm growth. In nearby Roberts Lake the  
131 parasite is extremely rare, because the fish are able to mount a strong fibrosis immune response  
132 that suppresses tapeworm growth and can even lead to parasite elimination. Importantly, the fish  
133 sampled here were not infected with this cestode parasite, but instead represent constitutive  
134 population-level variability. We specifically targeted the pronephros, an important hematopoietic  
135 organ that is believed to have essential roles in the production and development of immune cells  
136 (26). Resulting libraries ranged in size from 8,119 to 19,578 cells with mean reads per cell  
137 ranging from 15,580 to 55,204 and median genes per cell ranging from 307 to 707. Following  
138 filtering (see **Methods** for details) our final data set consisting of samples ranging between 1,780  
139 and 9,160 per library.

140 Analysis of resulting data revealed 24 unique clusters of cells, that could be condensed into 8  
141 major cell types based on patterns of expression (**Figure 1; Supplementary Figure 1;**  
142 **Supplementary Table 1; Supplementary File 1**). These eight cell types were representative of  
143 most major vertebrate immune cell types (27): hematopoietic cells (HCs), neutrophils, antigen  
144 presenting cells (APCs), B-cells, erythrocytes (RBCs), platelets, fibroblasts, and natural killer  
145 cells (NKC); **Supplementary Figures 2-9; Supplementary File 2**). Most of these cell types  
146 were easily identifiable based on comparison to existing data regarding vertebrate and teleost  
147 immune cell expression. For example, highly abundant neutrophils bear strong similarity to  
148 previously described teleost neutrophils, including high expression of zebrafish neutrophil  
149 marker *nephrosin* ((28); **Supplementary Figure 3**). APCs were marked by high expression of  
150 group-specific genes involved in the presentation of antigens via the MHC II system (29, 30),  
151 and low expression of B-cell marker genes such as *cd79a* ((31); **Supplementary Figure 5**). Also  
152 present in low abundance were a number of important minor immune cell types: platelets,  
153 fibroblasts, and NKCs; all of which were easily identifiable based on high expression of  
154 characteristic genes (**Supplementary Figures 7-9**). Interestingly NKCs were divided into two  
155 subgroups which were not easily distinguished due to low representation. One of these subgroups  
156 displayed constitutive expression of the human innate lymphoid cell (ILC) marker gene, *rorc*  
157 (32), as well as high expression of *runx3*, which modulates development of ILCs (33), providing

158 some support that this subgroup was comprised of putative fish ILCs. Conspicuously absent were  
159 putative T-cells. This can likely be explained due to the nature of the pronephros, which is  
160 believed to operate similarly to mammalian bone marrow (34-36). Consequently, T-cells are  
161 likely only transiently found in this organ, perhaps only early in life.

162

### 163 **Stickleback erythrocytes express a variety of immune genes**

164 In teleosts, unlike mammals, red blood cells are nucleated and genetically active (37). A large,  
165 heterogenous group of cells with high expression of hemoglobin-associated genes were  
166 identified as putative erythrocytes. Interestingly these cells also had high expression of a number  
167 of immune genes characteristic of both neutrophils and B-cells (**Figure 2**). Previous findings  
168 have indicated that teleost RBCs have diverse roles in the regulation of host immunity (38, 39).  
169 For example, it is well documented that teleost RBCs contribute to antiviral immunity (38, 40,  
170 41). Preliminary evidence suggests they also can phagocytose and kill bacterial pathogens (42)  
171 and even yeast (43). However, our results suggest further refinement of these functions.  
172 Clustering analysis shows two distinct subgroups of RBCs, dividing based on similarity to either  
173 myeloid (neutrophil) or lymphoid (B-cells) type cells (**Figure 2**). Thus, while previous studies  
174 have both characterized myeloid type functions (38, 41, 42) and document interactions with  
175 lymphoid cells (44), this is the first evidence for diversification of RBCs into distinct subgroups,  
176 each serving a particular immunological role. Further study is needed to improve understanding  
177 of the distinct roles of these two subtypes and their broad roles in fish immunity.

178

### 179 **Two groups of B-cells are identifiable: resting and plasma B-cells**

180 A large group of cells uniquely expressing *cd79a*, *swap70a*, and a number of putative  
181 immunoglobulin genes, was identified as putative B-cells (**Figure 1**). This group was comprised  
182 of three sub-clusters (original clusters 11, 12, 13; **Supplementary Figure 1**), two of which  
183 (cluster 12 and cluster 13) were readily distinguished by expression patterns (**Supplementary**  
184 **Figure 10**). The smaller of the two sub-clusters (cluster 13) had considerably higher expression  
185 of immunoglobulin genes as well as *X-box binding protein 1* (*xbp1*) and associated proteins, key  
186 markers of plasma cells in mammals (45). Thus, we concluded that these two groups likely  
187 comprised of resting B cells (cluster 12) and activated/plasma B cells (cluster 13). Previous work  
188 has documented the diversification of fish B cells into antibody secreting cells upon immune  
189 stimulation (46). Furthermore, studies have indicated that antibody-secreting cells (including  
190 plasma cells and plasmablasts) constitute a stable subpopulation of cells in the head kidney of  
191 other fish species. Interestingly though, low levels of resting B-cells in the head kidney have  
192 been documented in salmonids, which is contrary to our preliminary findings here (47). High  
193 levels of resting B-cells are characteristic of tissues involved in inducible responses to immune  
194 challenge; typically the blood and spleen in teleost fish (47). However, it is possible that some  
195 fish lineages may have evolved more plasticity in head kidney function as part of an inducible  
196 immune response. Further characterization of B-cell subpopulation in other tissue types from *G.*  
197 *aculeatus* will provide insight regarding the lineage-specific roles of various lymphoid tissues in  
198 immunity.

199

### 200 **Isolated populations of stickleback vary significantly in cell type abundance**

201 The nine fish sampled for our scRNAseq analysis were representative of three isolated and  
202 genetically divergent populations. These three populations, Roberts Lake, Gosling Lake, and  
203 Sayward (anadromous) have been well documented to vary considerably in their immune

204 responses to a common freshwater parasite, *Schistocephalus solidus* (25). The marine population  
205 is evolutionarily naïve to the parasite, which does not survive brackish water, and consequently  
206 is readily infected and permits rapid cestode growth. Both Gosling and Roberts Lakes are more  
207 resistant to laboratory infection than their marine ancestors, but the more resistant Roberts lake  
208 population significantly suppresses cestode growth and is more likely to encapsulate and kill the  
209 cestode in a fibrotic granuloma (25, 48). Consequently, we divided our samples based on  
210 population and compared both immune cell relative abundance and within-cell-type expression  
211 across these three populations. Comparing the three populations, we find significant variation in  
212 abundance in every cell type except fibroblasts (**Supplementary Table 2; Figure 3**). Roberts  
213 Lake fish, which are most resistant to the parasite, had considerably more neutrophils and  
214 platelets, but significantly less NKCs, RBCs, and B-cells than the other two populations.  
215 Sayward fish, which are anadromous and naïve to the parasite, had the highest abundance of  
216 APCs, B-cells, and RBCs.

217 Much of this observed variation in immune cell type abundance may be related to natural  
218 variation in parasite resistance. For example, Roberts lake fish had higher abundance of both  
219 neutrophils and platelets, which may contribute to enhanced resistance to helminth parasites.  
220 Neutrophils and other granulocyte cells such as eosinophils are important components of the  
221 initial innate immune response to helminths and other parasites (49, 50). Platelets, specifically  
222 thrombocyte-derived compounds, are important mediators of fibrotic responses (51, 52), and  
223 fibrosis is a major part of Roberts Lake sticklebacks' response to *S. solidus* infection (48).  
224 Consequently, enhanced abundance of both neutrophils and platelets in ROB fish likely allows  
225 for quick induction of resistance phenotypes (i.e. fibrosis; (53) and other immune responses  
226 which result in the efficient elimination of the parasite. It should be noted that the lack of  
227 variation in fibroblast abundance among populations is not unexpected; while platelets are  
228 normally originate in hematopoietic tissues, like the head kidneys (54), fibroblasts are usually  
229 stimulated at sites of damage (55), which is in the peritoneal (body) cavity for the *S. solidus*  
230 parasite.

231 Combined, the differences in relative abundance of immune cell types observed among our  
232 three populations of fish are indicative of micro-evolution in response to parasites. Because the  
233 fish used in this study were lab-raised in a shared environment, these between-population  
234 differences likely reflect heritable differences that evolved since the populations were founded.  
235 Roberts Lake fish, which evolved resistance to the helminth parasite *S. solidus*, is characterized  
236 by marked increases in immune cell subtypes which (in mice) are known to contribute to  
237 helminth responses. Thus, our results suggest that evolution of resistance to a parasite may not  
238 only occur on the gene level, but that resistance may also be the result of selection for broad-  
239 scale shifts in baseline immune cell type abundance.

240

### 241 **Expression of each cell type varies among populations**

242 In contrast to the significant variation in relative abundance of immune cell types between the  
243 three sampled populations, we found modest signatures of among-population variation in  
244 expression profiles within cell types (**Supplementary File 3**). Most notable was variation in  
245 expression of immunoglobulin-like genes in B-cells (**Figure 3**). Despite having significantly  
246 fewer B-cells in Roberts Lake fish, their B-cells exhibited higher average expression of  
247 immunoglobulin-type genes per cell. This may be a compensatory method as B cell production  
248 of immunoglobulin is an essential component of response to helminth infection (47). Indeed,  
249 higher expression of immunoglobulin genes by ROB B cells is likely the result of a significantly

250 higher relative abundance of putative plasma B cells in ROB fish (compared to resting B-cells).  
251 ROB fish had higher proportions of plasma cells generally, and as a subset of B cell population  
252 than both GOS and SAY fish (Chi-squared test;  $padj < 0.001$ ). Helminth-protective  $T_H2$ -type  
253 immune responses induce expansion of plasma cells producing IgE (56). Thus, a higher  
254 constitutive abundance of plasma-type B-cells in ROB fish may contribute to enhanced  
255 resistance to *S. solidus* parasites. Again, here our results indicate that micro-evolution of immune  
256 cell subtype abundance may significantly contribute to evolution of parasite resistance.

257 Finally, patterns of expression of neutrophil-associated markers also varied significantly  
258 across populations. Both HCs and RBCs in Roberts had significantly higher expression of  
259 neutrophil marker genes (**Figure 3**). This is likely the result of enhanced overall investment in  
260 neutrophil-like cells in Roberts fish, which may support a quick initial response to invading  
261 parasites (49, 50). Perhaps most interestingly, we observed population-specific, preferential  
262 expression of what is presumably duplicated copies of the important zebrafish neutrophil marker  
263 gene, *nephrosin* (*npsn*). We identified two highly similar genes annotated as *npsn*, both of which  
264 were significant markers of neutrophils, however one gene was preferentially expressed by  
265 Roberts fish, while the other was expressed higher in Gosling and Sayward neutrophils (**Figure**  
266 **3**). Sequence comparison of these two gene copies revealed that while highly similar to zebrafish  
267 *npsn*, there are several species-specific, and copy-specific amino acid substitutions in the  
268 sequences, suggesting potential neofunctionalization (**Supplementary Figure 11**).  
269 Neofunctionalization of one copy of this gene may be the result of co-evolutionary selective  
270 pressure. While neofunctionalization of parasite virulence genes has been recorded in the past  
271 (57, 58), this is to our knowledge the first evidence of neofunctionalization potentially  
272 contributing to host resistance.

### 273 274 **Insights from scRNAseq analyses improve interpretation of past traditional RNAseq** 275 **studies**

276 The scRNAseq data allowed us to confidently identify a suite of genes which are markers of each  
277 of these putative 8 cell types (**Supplementary File 2**). Using these new candidate marker genes,  
278 we can re-evaluate findings of past RNAseq studies to understand the relative contributions of  
279 changes in gene expression versus changes in cell abundance. Specifically we leveraged these  
280 markers to re-interpret results from two previous studies for which we had both traditional  
281 RNAseq expression data and flow cytometry data coarsely estimating granulocyte to lymphocyte  
282 relative abundance using forward and side-scatter gating (2, 59). The first, and larger, of the two  
283 studies investigated variation in constitutive and induced immune response to parasite infections  
284 in laboratory reared F2 fish (59). Within this data set, granulocyte and lymphocyte frequencies  
285 are, respectively, correlated to expression of both putative granulocyte markers (*nephrosin* B,  
286 transcript 1; pearson correlation,  $p < 0.001$ ,  $r = 0.3904$ ) and lymphocyte markers (*cd79a*; pearson  
287 correlation,  $p < 0.001$ ,  $r = 0.4569$ ). The second, smaller, study conducted a similar experimental  
288 parasite infection of laboratory reared F1 fish (2). Within this study, these correlations are less  
289 significant for lymphocytes (Pearson correlation,  $p = 0.016$ ,  $r = 0.25$ ), and both non-significant  
290 and trending in the opposite direction for granulocytes (pearson correlation,  $p = -0.17$ ,  $r = 0.12$ ;  
291 **Figure 4**). These inconsistencies are likely due to the nature of our correlative data. Flow  
292 cytometry grouped cells into two large bins: granulocytes and lymphocytes. Thus, finding two  
293 markers that accurately correlate to these broad groups across experiments is difficult,  
294 particularly for diverse granulocytes. Still, these findings suggest that variation in expression of  
295 cell markers identified here may be reflective of changes in abundance of immune cell types. We

296 believe that further validation will demonstrate that this data provides a powerful new resource  
297 that will increase the interpretive power of traditional RNAseq analyses.

298 Assuming that changes in expression of these markers is at least in part due to changes in  
299 their respective cell type, we can now glean more insight regarding the cellular changes in  
300 response to infection of *G. aculeatus* by *S. solidus* by re-examining previous datasets.  
301 Consequently, we applied the markers generated here to reinterpret results from the two studies  
302 of response experimental parasite infection in laboratory reared F1 and F2 fish (2, 59). In each  
303 case we conducted Chi-squared tests to detect over-representation of cell markers (generally or  
304 specific cell type) among significantly differentially expressed genes. In the case of groups  
305 where significant over-representation was detected, we conducted a proportion test to detect  
306 statically significant skew in the directionality of differential expression. In the smaller study of  
307 response of laboratory reared F1 fish, we observed few significant patterns of biological interest  
308 (2); **Supplementary Table 3**). However, in our larger dataset (F2 fish) we noticed significant  
309 over-representation of APCs and B-cell marker genes among the genes differentially expressed  
310 as a result of infection or between populations respectively (59); **Figure 4, Supplementary**  
311 **Table 3**). Markers of APCs were not only significantly over-represented, but also exclusively  
312 increased in response to infection. Alternatively activated macrophages are known to play key  
313 roles in response to helminth infection, including mediating inflammatory responses (60, 61). B-  
314 cell markers were expressed a higher levels in susceptible back-crossed fish compared to  
315 resistant back-crosses, consistent with analysis of scRNA data presented here.

316 Finally, we also considered results from correlative analyses of associations between gene  
317 expression in F2 fish, and gut microbiome composition (11). Here we observed significant over-  
318 representation of markers of neutrophil, B-cell, and fibroblast cells among lists of genes  
319 significantly correlated to abundance of specific microbial taxa in the gut (**Supplementary**  
320 **Table 3**). Neutrophils demonstrated the most consistent patterns of association with microbial  
321 taxa abundance, with some microbial taxa demonstrating strongly significant positive or negative  
322 associations with many neutrophil markers (**Figure 4**). Neutrophils and gut microbiota are  
323 believed to be functionally linked, with gut microbiota regulating components of neutrophil  
324 activity and vice versa (62). Our findings suggest that specific microbiota have systemic effects  
325 on the proliferation of (or lack thereof) neutrophils in hematopoietic organs. In sum, the markers  
326 discovered here provide new power to interpret traditional RNAseq data and begin to disentangle  
327 relative contributes of changes in gene expression versus changes in cell type abundance. These  
328 results point to the value of small-sample scRNAseq in guiding reinterpretation of new or  
329 existing large-sample bulk-tissue transcriptomic data.

330

### 331 **Conclusions**

332 Here we present a robust analysis of the contributions of variation in immune system structure  
333 (relative cell type abundance and function) to observed variation in immune response between  
334 populations of fish. While numerous previous studies have suggested that shifts at the genetic  
335 level contribute to variation in immune response (10, 12, 48, 63), our study is the first to look at  
336 this variation among natural populations at the cellular scale. Using single-cell RNAseq analyses,  
337 we demonstrate that independent populations vary significantly in both abundance and  
338 expression patterns of immune cell types. Furthermore, our data suggest that this variation may  
339 be the result of micro-evolution of immune cell repertoires in response to biotic stimuli (i.e. a  
340 novel parasite). This is, to our knowledge, the first evidence that rapid evolution of immune cell  
341 repertoires among populations both occurs, and potentially contributes to variation in immune



342 response and infection outcome. Our results add to the growing body of evidence that suggests  
343 that the immune system may be much more malleable than once thought. Furthermore, these  
344 findings provide compelling rationale for further studies investigating adaptability of immune  
345 system structure within and between species in response to eco-evo feedbacks. Also notably, our  
346 findings present the first description of prominent immune cell types in an important ecological  
347 and evolutionary model species. This provides new cell marker resources that can be used to  
348 streamline further immunological studies and provide new insight into traditional RNAseq  
349 studies. In sum, our work not only adds strong evidence suggesting that micro-evolution of  
350 immune cell repertoires contributes to variation in immune response, but also provides a robust  
351 new tool for researchers utilizing the stickleback system as a model of evolutionary and  
352 ecological immunology.

353

## 354 **Methods**

### 355 **Sample Collection & Processing**

356 Single cell libraries were generated from head kidneys of laboratory reared F1 stickleback  
357 from three populations on Vancouver Island in British Columbia (Sayward Estuary, Roberts  
358 Lake, Gosling Lake). Reproductively mature fish were collected at each location using  
359 minnow traps. Gravid females were stripped of their eggs, which were then fertilized using  
360 sperm obtained from macerated testes of males from the same lake. Fish were collected with  
361 permission from the Ministry of Forests, Lands, and Natural Resource Operations of British  
362 Columbia (Scientific Fish Collection permit NA12-77018 and NA12-84188). The resulting  
363 eggs were shipped back to Austin, Texas, hatched, and reared to maturity in controlled  
364 laboratory conditions. At approximately 2-3 years of age, fish were transferred to aquarium  
365 facilities at the University of Connecticut. At the time of sampling, fish ranged from 3  
366 (Sayward and Gosling) to 4 (Roberts) years of age.

367 We generated single cell suspensions from the pronephros (head kidney) three fish from  
368 each population (Sayward, Roberts, Gosling). Fish were humanely euthanized one at a time,  
369 and their head kidneys immediately extracted. Dissected head kidneys were placed in 2mL of  
370 R-90 media (90% RPMI 1640 with L-Glutamine, without Phenol red; Gibco) in a sterile 24-  
371 well plate on ice. Tissue was then physically dissociated using a sterile pipette tip. The  
372 resulting slurry was then strained through a 40 $\mu$ m nylon filter. An additional 2mL R-90 was  
373 added to the resulting suspension. Cells were then spun at 440g for 10 minutes at 4°C. The  
374 supernatant was removed, and cells were resuspended in 2mL R-90. Cells were spun once  
375 more time, and the resulting supernatant replaced with 1 mL R-90. Cell suspensions were  
376 then transported on ice to the Jackson Lab facility in Hartford, Connecticut where samples  
377 were prepared for sequencing and sequenced within 6 hours of initial sample collection.

378

### 379 **Single Cell Library Preparation and Sequencing**

380 Cells were washed and suspended in PBS containing 0.04% BSA and immediately processed  
381 as follows. Cell viability was assessed on a Countess II automated cell counter  
382 (ThermoFisher), and an estimated 12,000 cells were loaded onto one lane of a 10x Genomics  
383 Chromium Controller. Single cell capture, barcoding, and single-indexed library preparation  
384 were performed using the 10x Genomics 3' Gene Expression platform version 3 chemistry  
385 and according to the manufacturer's protocol (#CG00052, (64). cDNA and libraries were  
386 checked for quality on Agilent 4200 TapeStation, quantified by KAPA qPCR, and sequenced  
387 on an Illumina sequencer targeted 6,000 barcoded cells with an average sequencing depth of

388 50,000 read pairs per cell. Three initial libraries (1 per population) were sequenced on  
389 individual lanes of a HiSeq 4000 flow cell; all other libraries were sequenced on a NovaSeq  
390 6000 S2 flow cell, each pooled at 16.67% of the flow cell lane.

391 Illumina base call files for all libraries were converted to FASTQs using bcl2fastq  
392 v2.20.0.422 (Illumina) and FASTQ files were aligned to reference genome constructed from  
393 the v5 *G. aculeatus* assembly and annotation files available at  
394 <https://stickleback.genetics.uga.edu/> (65). Briefly, annotations from Ensembl (release 95)  
395 were combined with repeat, Y chromosome, and revised annotations from Nath et al. using  
396 AGAT (0.4.0) (66), and a STAR-compatible reference genome was generated Cell Ranger  
397 (v3.1.0, 10x Genomics) using these annotations and the v5 assembly from Nath et al. The  
398 Cell Ranger count (v3.1.0) pipeline was used to construct cell-by-gene counts matrix for each  
399 library, subsequently analyzed using Scanpy 1.3.7 (67) and the Loupe Cell Browser (10x  
400 Genomics).

401 Each counts matrix was individually subjected to quality control filtering, such that cells  
402 with more than 35,000 UMIs, fewer than 400 genes, more than 30% mtRNA content, and  
403 more than 1,000 hemoglobin transcripts were discarded from downstream analysis. The nine  
404 filtered counts matrices were concatenated, normalized by per-cell library size, and log  
405 transformed. The expression profiles of each cell at the 4,000 most highly variable genes (as  
406 measured by dispersion (64, 68) were used for principal component (PC) analysis and  
407 subsequently batch corrected using Harmony (69). The batch corrected PCs were utilized for  
408 neighborhood graph generation (using 25 nearest-neighbors) and dimensionality reduction  
409 with UMAP (70). Clustering was performed on this neighborhood graph using the Leiden  
410 community detection algorithm (71). Subclustering was performed on a per-cluster *ad hoc*  
411 basis to separate visually distinct subpopulations of cells. This UMAP embedding and  
412 clustering metadata were then imported into the Loupe Cell Browser (generated using Cell  
413 Ranger aggr (v3.1.0)) for interactive analysis.

414

### 415 **Cluster Identification**

416 Once data (UMAP embedding and clustering metadata) was loaded into the Loupe Cell  
417 Browser, we then generated lists of marker genes for each of the identified clusters using the  
418 “Globally Distinguishing” feature. Marker genes were classified as those genes up-regulated  
419 in each cluster (compared to all other cells) with an adjusted p-value less than 0.1. Next we  
420 assigned tentative identities to each of these initial clusters by comparison of marker genes to  
421 available literature regarding markers of immune cells in teleost fish and other vertebrates.  
422 During this initial identification process, we identified multiple groups of cells with  
423 homology to the same major immune cell type (e.x. three clusters demonstrated patterns of  
424 expression indicative of neutrophils). Consequently, we condensed the initial 19 identified  
425 clusters into 8 major groups based on homology to known vertebrate immune cell types. We  
426 examined differential expression between sub-clusters within these major groups using the  
427 “Locally Distinguishing” feature in Loupe Cell Browser. Cluster identification and sub-  
428 cluster distinctions were confirmed by visual analysis of expression of major immune cell  
429 type markers in Loupe Cell Browser. Violin plots and heatmaps displaying patterns of  
430 expression across major group and sub-clusters within groups were generated in R using read  
431 count matrixes and cluster identity information (exported from Loupe Cell Browser).  
432 Relevant code can be found at: <https://github.com/lfuess/scRNAseq>.

433

## 434 **Comparative Analyses Across Populations**

435 When comparing across populations, we assessed two hypotheses: **1)** relative abundance of  
436 immune cell types is variable across populations and **2)** expression patterns within each  
437 identified immune cell type are variable across populations. First, to identify differences in  
438 relative abundance of each of our 8 major immune cell types we performed independent,  
439 binomial general linear models for each cell type. Tukey’s post-hoc tests were used for pair-  
440 wise comparisons if significant differences were identified between populations (code can be  
441 found at: <https://github.com/lfuess/scRNAseq>). Second, to identify differences in gene  
442 expression patterns within each of our identified immune cell types, we again used the  
443 “Locally Distinguishing” feature in Loupe Cell Browser. Cells within each major group were  
444 subdivided by population, and then all possible pairwise comparisons of gene expression  
445 were conducted. Genes with adjusted p-values < 0.10 were identified as significantly  
446 differentially expressed. Relevant violin plots and heatmaps were generated in R using read  
447 count matrixes and cluster identity information (exported from Loupe Cell Browser).  
448 Relevant code can be found at: <https://github.com/lfuess/scRNAseq>.

449

## 450 **Sequence Alignment**

451 In order to examine sequence divergence in the two identified copies of neutrophil marker  
452 gene, *nephrosin* (*npsn*), we conducted a multiple sequence alignment of both *npsn* transcripts  
453 from stickleback and the zebrafish *npsn* transcript sequence using the R package *msa* (72).

454

## 455 **Comparison to Past Analyses**

456 We leveraged past transcriptomic analysis of stickleback head kidney to assess whether  
457 whole tissue-measured expression of putative markers identified here could be used as a  
458 reliable metric of relative cell type abundance. We specifically analyzed two past  
459 transcriptomic data sets: **1)** an analysis of laboratory-reared F1 fish from Roberts and Gosling  
460 Lake experimentally exposed to parasites (2), and **2)** an analysis of laboratory-reared F2 and  
461 backcrossed fish, the offspring of fish from experiment 1, experimentally exposed to  
462 parasites (59). For both of these datasets we had access to transcriptomic data detailing whole  
463 tissue expression of our putative cell markers, and flow cytometry data coarsely estimating  
464 granulocyte to lymphocyte relative abundance using forward and side-scatter gating. For  
465 each data set we examined correlation between normalized gene expression of putative  
466 markers and square root transformed frequency data for granulocytes or lymphocytes as  
467 appropriate.

468 Once we established that whole-tissue expression of putative cell markers was at least  
469 partially indicative of relative abundance of immune cell types, we then leveraged our newly  
470 identified cell markers to re-interpret three past transcriptomic studies of stickleback  
471 immunity: the two previously mentioned transcriptomic studies of F1 & F2/backcross fish to  
472 immune challenge (2, 59), and an additional study examining correlations between head  
473 kidney gene expression and gut microbiome composition (11). Specifically, we used chi  
474 squared tests to identify significant over-representation of markers of any given cell type  
475 within lists of genes significant differentially expressed as a result of traits of interest, or  
476 genes significantly correlated to microbial diversity/taxa of interest. Chi-squared tests were  
477 used to test for over-representation of each immune cell type within each list of genes  
478 independently.

479

480 **Acknowledgements**

481 We gratefully acknowledge the contribution of Bill Flynn and Martine Seignon of the Single Cell  
482 Biology service as well as the Genome Technologies and Cyberinfrastructure high performance  
483 computing resources at The Jackson Laboratory for expert assistance with the work described in  
484 this publication. This work was supported by funding from NSF (IOS-1645170), the University  
485 of Connecticut (Startup to DIB), and an American Association of Immunologists Intersect  
486 Postdoctoral Fellowship to LEF.

487

488

489 **Competing Interests**

490 The authors declare no competing interests.

491

## 492 **References**

493

- 494 1. Fuess LE, Weber JN, den Haan S, Steinel NC, Shim KC, Bolnick DI. A test of the Baldwin  
495 Effect: Differences in both constitutive expression and inducible responses to parasites underlie  
496 variation in host response to a parasite. *BioRxiv*. 2020.
- 497 2. Lohman BK, Steinel NC, Weber JN, Bolnick DI. Gene Expression Contributes to the  
498 Recent Evolution of Host Resistance in a Model Host Parasite System. *Front Immunol*.  
499 2017;8:1071.
- 500 3. Travis J. Origins. On the origin of the immune system. *Science*. 2009;324(5927):580-2.
- 501 4. Gignoux-Wolfsohn SA, Pinsky ML, Kerwin K, Herzog C, Hall M, Bennett AB, et al.  
502 Genomic signatures of selection in bats surviving white-nose syndrome. *Mol Ecol*.  
503 2021;30(22):5643-57.
- 504 5. Cagliani R, Sironi M. Pathogen-driven selection in the human genome. *Int J Evol Biol*.  
505 2013;2013:204240.
- 506 6. Frick WF, Pollock JF, Hicks AC, Langwig KE, Reynolds DS, Turner GG, et al. An emerging  
507 disease causes regional population collapse of a common North American bat species. *Science*.  
508 2010;329(5992):679-82.
- 509 7. Hochachka WM, Dobson AP, Hawley DM, Dhondt AA. Host population dynamics in the  
510 face of an evolving pathogen. *J Anim Ecol*. 2021;90(6):1480-91.
- 511 8. Grab KM, Hiller BJ, Hurlbert JH, Ingram ME, Parker AB, Pokutnaya DY, et al. Host  
512 tolerance and resistance to parasitic nest flies differs between two wild bird species. *Ecol Evol*.  
513 2019;9(21):12144-55.
- 514 9. Fuess LE, Pinzon CJ, Weil E, Grinshpon RD, Mydlarz LD. Life or death: disease-tolerant  
515 coral species activate autophagy following immune challenge. *Proc Biol Sci*. 2017;284(1856).
- 516 10. Lazzaro BP, Scurman BK, Clark AG. Genetic basis of natural variation in *D. melanogaster*  
517 antibacterial immunity. *Science*. 2004;303(5665):1873-6.
- 518 11. Fuess LE, den Haan S, Ling F, Weber JN, Steinel NC, Bolnick DI. Immune Gene Expression  
519 Covaries with Gut Microbiome Composition in Stickleback. *mBio*. 2021;12(3).
- 520 12. Ellison AR, Tunstall T, DiRenzo GV, Hughey MC, Rebollar EA, Belden LK, et al. More than  
521 skin deep: functional genomic basis for resistance to amphibian chytridiomycosis. *Genome Biol*  
522 *Evol*. 2014;7(1):286-98.
- 523 13. Schröder NWJ, Schumann RR. Single nucleotide polymorphisms of Toll-like receptors  
524 and susceptibility to infectious disease. *The Lancet Infectious Diseases*. 2005;5(3):156-64.
- 525 14. Schenekar T, Weiss S. Selection and genetic drift in captive versus wild populations: an  
526 assessment of neutral and adaptive (MHC-linked) genetic variation in wild and hatchery brown  
527 trout (*Salmo trutta*) populations. *Conservation Genetics*. 2017;18(5):1011-22.
- 528 15. Shinkai H, Arakawa A, Tanaka-Matsuda M, Ide-Okumura H, Terada K, Chikyu M, et al.  
529 Genetic variability in swine leukocyte antigen class II and Toll-like receptors affects immune  
530 responses to vaccination for bacterial infections in pigs. *Comp Immunol Microbiol Infect Dis*.  
531 2012;35(6):523-32.
- 532 16. Pérez-Espona S, Goodall-Copestake WP, Savirina A, Bobovikova J, Molina-Rubio C, Pérez-  
533 Barbería FJ. First assessment of MHC diversity in wild Scottish red deer populations. *European*  
534 *Journal of Wildlife Research*. 2019;65(2).

- 535 17. Savage AE, Zamudio KR. MHC genotypes associate with resistance to a frog-killing  
536 fungus. *Proc Natl Acad Sci U S A*. 2011;108(40):16705-10.
- 537 18. Hilton HG, Rubinstein ND, Janki P, Ireland AT, Bernstein N, Fong NL, et al. Single-cell  
538 transcriptomics of the naked mole-rat reveals unexpected features of mammalian immunity.  
539 *PLoS Biol*. 2019;17(11):e3000528.
- 540 19. Guslund NC, Solbakken MH, Briec MSO, Jentoft S, Jakobsen KS, Qiao SW. Single-Cell  
541 Transcriptome Profiling of Immune Cell Repertoire of the Atlantic Cod Which Naturally Lacks  
542 the Major Histocompatibility Class II System. *Front Immunol*. 2020;11:559555.
- 543 20. Dheilly NM, Adema C, Raftos DA, Gourbal B, Grunau C, Du Pasquier L. No more non-  
544 model species: the promise of next generation sequencing for comparative immunology. *Dev*  
545 *Comp Immunol*. 2014;45(1):56-66.
- 546 21. Sudhagar A, Kumar G, El-Matbouli M. Transcriptome Analysis Based on RNA-Seq in  
547 Understanding Pathogenic Mechanisms of Diseases and the Immune System of Fish: A  
548 Comprehensive Review. *Int J Mol Sci*. 2018;19(1).
- 549 22. McKinnon JS, Rundle HD. Speciation in nature: The threespine stickleback model  
550 systems. *Trends in ecology & evolution*. 2002;17:480-8.
- 551 23. Simmonds NE, Barber I. The Effect of Salinity on Egg Development and Viability of  
552 *Schistocephalus solidus* (Cestoda: Diphyllbothriidea). *J Parasitol*. 2016;102(1):42-6.
- 553 24. Weber JN, Kalbe M, Shim KC, Erin NI, Steinel NC, Ma L, et al. Resist globally, infect  
554 locally: A transcontinental test of adaptation by stickleback and their tapeworm parasite.  
555 *American Naturalist*. 2017;189(1):43-57.
- 556 25. Weber JN, Steinel NC, Shim KC, Bolnick DI. Recent evolution of extreme cestode growth  
557 suppression by a vertebrate host. *Proc Natl Acad Sci U S A*. 2017;114(25):6575-80.
- 558 26. Kum C, Sekkin S. *The Immune System Drugs in Fish: Immune Function, Immunoassay,*  
559 *Drugs*. 2011.
- 560 27. Carmona SJ, Gfeller D. Deciphering the Evolution of Vertebrate Immune Cell Types with  
561 Single-Cell RNA-Seq. In: Pontarotti P, editor. *Origin and Evolution of Biodiversity*. Cham:  
562 Springer International Publishing; 2018. p. 95-111.
- 563 28. Di Q, Lin Q, Huang Z, Chi Y, Chen X, Zhang W, et al. Zebrafish nephrosin helps host  
564 defence against *Escherichia coli* infection. *Open Biol*. 2017;7(8).
- 565 29. Al-Daccak R, Mooney N, Charron D. MHC class II signaling in antigen-presenting cells.  
566 *Curr Opin Immunol*. 2004;16(1):108-13.
- 567 30. Roche PA, Furuta K. The ins and outs of MHC class II-mediated antigen processing and  
568 presentation. *Nat Rev Immunol*. 2015;15(4):203-16.
- 569 31. Chu PG, Arber DA. CD79: a review. *Appl Immunohistochem Mol Morphol*. 2001;9(2):97-  
570 106.
- 571 32. Hoorweg K, Peters CP, Cornelissen F, Aparicio-Domingo P, Papazian N, Kazemier G, et al.  
572 Functional differences between human NKp44(-) and NKp44(+) RORC+ innate lymphoid cells.  
573 *Frontiers in Immunology*. 2012;3.
- 574 33. Ebihara T, Song C, Ryu SH, Plougastel-Douglas B, Yang L, Levanon D, et al. Runx3  
575 specifies lineage commitment of innate lymphoid cells. *Nat Immunol*. 2015;16(11):1124-33.
- 576 34. Tomonaga S, Hirokane T, Awaya K. Lymphoid Cells in the Hagfish. *Zoological magazine*.  
577 1973;82(2):133-5.

- 578 35. Hitzfeld B. Fish Immune System. In: Assenmacher M, Avraham HK, Avraham S, Bala S,  
579 Barnett J, Basketter D, et al., editors. Encyclopedic Reference of Immunotoxicology. Berlin,  
580 Heidelberg: Springer Berlin Heidelberg; 2005. p. 242-5.
- 581 36. Kum C, Sekki S. The Immune System Drugs in Fish: Immune Function, Immunoassay,  
582 Drugs. In: Aral F, Do Z, editors. Recent Advances in Fish Farms: IntechOpen; 2011.
- 583 37. Witeska M. Erythrocytes in teleost fishes: a review. *Zoology and Ecology*.  
584 2013;23(4):275-81.
- 585 38. Pereiro P, Romero A, Diaz-Rosales P, Estepa A, Figueras A, Novoa B. Nucleated Teleost  
586 Erythrocytes Play an Nk-Lysin- and Autophagy-Dependent Role in Antiviral Immunity. *Front*  
587 *Immunol*. 2017;8:1458.
- 588 39. Shen Y, Wang D, Zhao J, Chen X. Fish red blood cells express immune genes and  
589 responses. *Aquaculture and Fisheries*. 2018;3(1):14-21.
- 590 40. Nombela I, Carrion A, Puente-Marin S, Chico V, Mercado L, Perez L, et al. Infectious  
591 pancreatic necrosis virus triggers antiviral immune response in rainbow trout red blood cells,  
592 despite not being infective. *F1000Res*. 2017;6:1968.
- 593 41. Puente-Marin S, Nombela I, Chico V, Ciordia S, Mena MC, Perez LG, et al. Potential Role  
594 of Rainbow Trout Erythrocytes as Mediators in the Immune Response Induced by a DNA  
595 Vaccine in Fish. *Vaccines (Basel)*. 2019;7(3).
- 596 42. Qin Z, Vijayaraman SB, Lin H, Dai Y, Zhao L, Xie J, et al. Antibacterial activity of  
597 erythrocyte from grass carp (*Ctenopharyngodon idella*) is associated with phagocytosis and  
598 reactive oxygen species generation. *Fish Shellfish Immunol*. 2019;92:331-40.
- 599 43. Passantino L, Altamura M, Cianciotta A, Patruno R, Tafaro A, Jirillo E, et al. Fish  
600 immunology. I. Binding and engulfment of *Candida albicans* by erythrocytes of rainbow trout  
601 (*Salmo gairdneri* Richardson). *Immunopharmacol Immunotoxicol*. 2002;24(4):665-78.
- 602 44. Jeong J-M, An CM, Kim M-C, Park C-I. Cooperation of erythrocytes with leukocytes in  
603 immune response of a teleost *Oplegnathus fasciatus*. *Genes & Genomics*. 2016;38(10):931-8.
- 604 45. Shaffer AL, Shapiro-Shelef M, Iwakoshi NN, Lee AH, Qian SB, Zhao H, et al. XBP1,  
605 downstream of Blimp-1, expands the secretory apparatus and other organelles, and increases  
606 protein synthesis in plasma cell differentiation. *Immunity*. 2004;21(1):81-93.
- 607 46. Jenberie S, Thim HL, Sunyer JO, Skjoldt K, Jensen I, Jorgensen JB. Profiling Atlantic salmon  
608 B cell populations: CpG-mediated TLR-ligation enhances IgM secretion and modulates immune  
609 gene expression. *Sci Rep*. 2018;8(1):3565.
- 610 47. Ma C, Ye J, Kaattari SL. Differential compartmentalization of memory B cells versus  
611 plasma cells in salmonid fish. *Eur J Immunol*. 2013;43(2):360-70.
- 612 48. Weber JN, Steinel NC, Peng F, Shim KC, Lohman BK, Fuess L, et al. Evolution of a costly  
613 immunity to cestode parasites is a pyrrhic victory. 2021.
- 614 49. Chen F, Wu W, Millman A, Craft JF, Chen E, Patel N, et al. Neutrophils prime a long-lived  
615 effector macrophage phenotype that mediates accelerated helminth expulsion. *Nat Immunol*.  
616 2014;15(10):938-46.
- 617 50. El-Naccache DW, Chen F, Chen N, Gause WC. The NET Effect of Neutrophils during  
618 Helminth Infection. *Cell Host Microbe*. 2020;27(2):165-8.
- 619 51. Antoniades HN, Bravo MA, Avila RE, Galanopoulos T, Neville-Golden J, Maxwell M, et al.  
620 Platelet-derived growth factor in idiopathic pulmonary fibrosis. *J Clin Invest*. 1990;86(4):1055-  
621 64.

- 622 52. Abdollahi A, Li M, Ping G, Plathow C, Domhan S, Kiessling F, et al. Inhibition of platelet-  
623 derived growth factor signaling attenuates pulmonary fibrosis. *J Exp Med*. 2005;201(6):925-35.
- 624 53. Hund AK, Fuess LE, Kenney ML, Maciejewski MF, Marini JM, Shim KC, et al. Rapid  
625 Evolution of Parasite Resistance via Improved Recognition and Accelerated Immune Activation  
626 and Deactivation. *bioRxiv*. 2020:2020.07.03.186569.
- 627 54. Chang Y, Bluteau D, Debili N, Vainchenker W. From hematopoietic stem cells to  
628 platelets. *J Thromb Haemost*. 2007;5 Suppl 1:318-27.
- 629 55. Wynn TA. Cellular and molecular mechanisms of fibrosis. *J Pathol*. 2008;214(2):199-210.
- 630 56. Anthony RM, Rutitzky LI, Urban JF, Jr., Stadecker MJ, Gause WC. Protective immune  
631 mechanisms in helminth infection. *Nat Rev Immunol*. 2007;7(12):975-87.
- 632 57. Lilley CJ, Maqbool A, Wu D, Yusup HB, Jones LM, Birch PRJ, et al. Effector gene birth in  
633 plant parasitic nematodes: Neofunctionalization of a housekeeping glutathione synthetase  
634 gene. *PLoS Genet*. 2018;14(4):e1007310.
- 635 58. Heidel-Fischer HM, Kirsch R, Reichelt M, Ahn SJ, Wielsch N, Baxter SW, et al. An Insect  
636 Counteradaptation against Host Plant Defenses Evolved through Concerted  
637 Neofunctionalization. *Mol Biol Evol*. 2019;36(5):930-41.
- 638 59. Fuess LE, Weber JN, den Haan S, Steinel NC, Shim KC, Bolnick DI. Between-population  
639 differences in constitutive and infection-induced gene expression in threespine stickleback. *Mol*  
640 *Ecol*. 2021.
- 641 60. Coakley G, Harris NL. Interactions between macrophages and helminths. *Parasite*  
642 *Immunol*. 2020;42(7):e12717.
- 643 61. Kreider T, Anthony RM, Urban JF, Jr., Gause WC. Alternatively activated macrophages in  
644 helminth infections. *Curr Opin Immunol*. 2007;19(4):448-53.
- 645 62. Lajqi T, Poschl J, Frommhold D, Hudalla H. The Role of Microbiota in Neutrophil  
646 Regulation and Adaptation in Newborns. *Front Immunol*. 2020;11:568685.
- 647 63. Weiss M, Sniezko RA, Puiu D, Crepeau MW, Stevens K, Salzberg SL, et al. Genomic basis  
648 of white pine blister rust quantitative disease resistance and its relationship with qualitative  
649 resistance. *Plant J*. 2020;104(2):365-76.
- 650 64. Zheng GX, Terry JM, Belgrader P, Ryvkin P, Bent ZW, Wilson R, et al. Massively parallel  
651 digital transcriptional profiling of single cells. *Nat Commun*. 2017;8:14049.
- 652 65. Nath S, Shaw DE, White MA. Improved contiguity of the threespine stickleback genome  
653 using long-read sequencing. *G3 (Bethesda)*. 2021;11(2).
- 654 66. Dainat J, Herenu D, pascal-git. NBISweden/AGAT: AGAT-v0.8.0. *Zendodo*. 2021.
- 655 67. Wolf FA, Angerer P, Theis FJ. SCANPY: large-scale single-cell gene expression data  
656 analysis. *Genome Biol*. 2018;19(1):15.
- 657 68. Satija R, Farrell JA, Gennert D, Schier AF, Regev A. Spatial reconstruction of single-cell  
658 gene expression data. *Nat Biotechnol*. 2015;33(5):495-502.
- 659 69. Korsunsky I, Millard N, Fan J, Slowikowski K, Zhang F, Wei K, et al. Fast, sensitive and  
660 accurate integration of single-cell data with Harmony. *Nat Methods*. 2019;16(12):1289-96.
- 661 70. McInnes L, Healy J, Melville J. UMAP: Uniform Manifold Approximation and Projection  
662 for Dimension Reduction. *arXiv*. 2020.
- 663 71. Traag VA, Waltman L, van Eck NJ. From Louvain to Leiden: guaranteeing well-connected  
664 communities. *Sci Rep*. 2019;9(1):5233.



665 72. Bodenhofer U, Bonatesta E, Horejs-Kainrath C, Hochreiter S. msa: an R package for  
666 multiple sequence alignment. *Bioinformatics*. 2015;31(24):3997-9.  
667

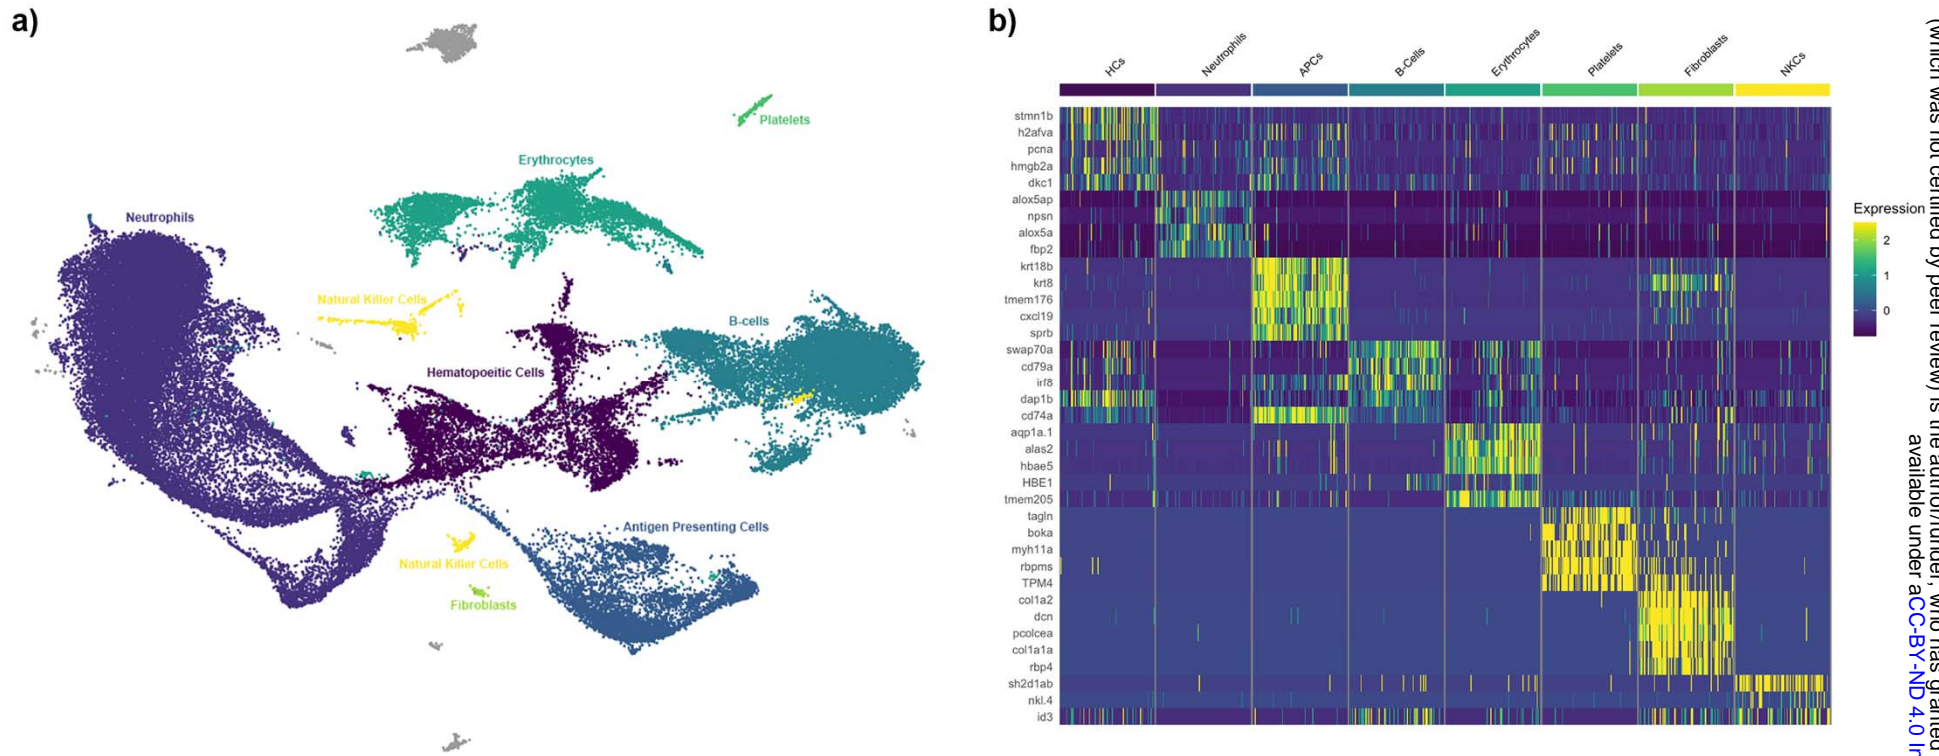

**Figure 1:** a) UMAP projection of head kidney cells generated from combining all 9 samples. Each point represents a single cell. Cells are color-coded by their cluster and annotated cell type. Cells are shown grouped into major cell type clusters based on distinguishing genes. For original cluster assignments see **Supplementary Figure 1 & Supplementary Table 1.** b) heatmap of the top five annotated distinguishing genes per cluster. Scaled expression, generated using the Seurat R package is displayed for each gene. Cells are grouped by type, genes are listed in order of significance. Only 3 annotated genes were significant for the NKC cluster.

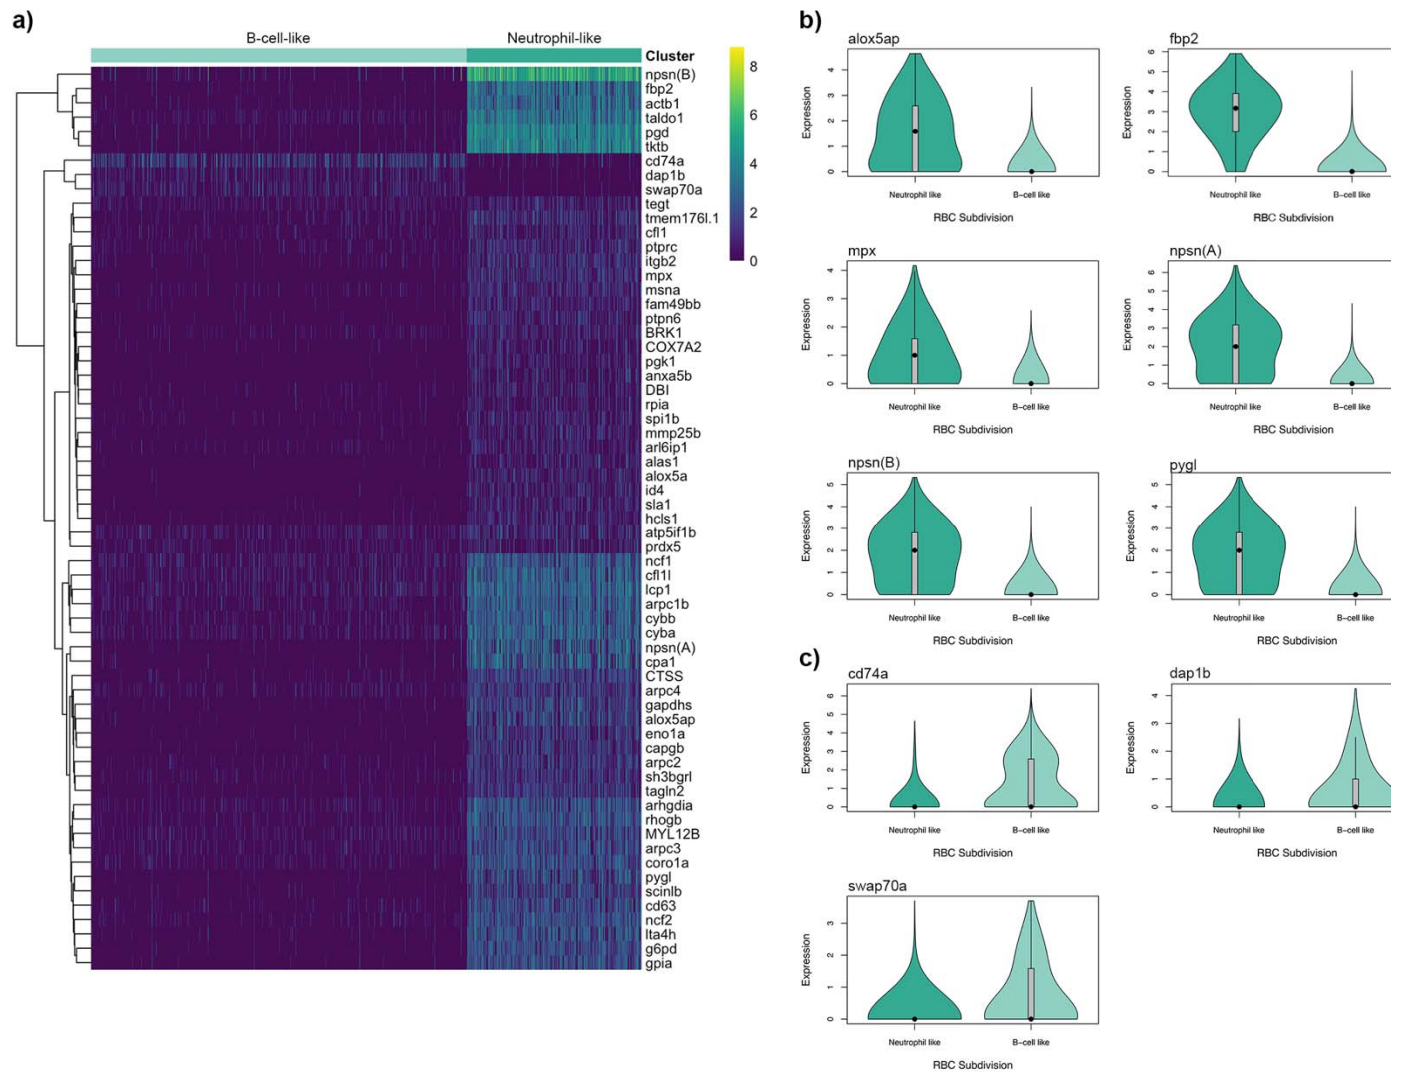

**Figure 2:** Differential expression of immune genes among the two identified RBC subgroups (neutrophil like and B-cell like). **A)** heatmap of log normalized expression of annotated B-cell and Neutrophil marker genes which were significantly differentially expressed between the two RBC subgroups (mitochondrial and ribosomal genes excluded). Heatmap generated using the pheatmap package in R. **B)** Violin plot of log normalized expression of significantly differentially expressed neutrophil marker genes among the two subgroups of cells. **C)** Violin plot of log normalized expression of significantly differentially expressed B-cell marker genes among the two subgroups of cells.

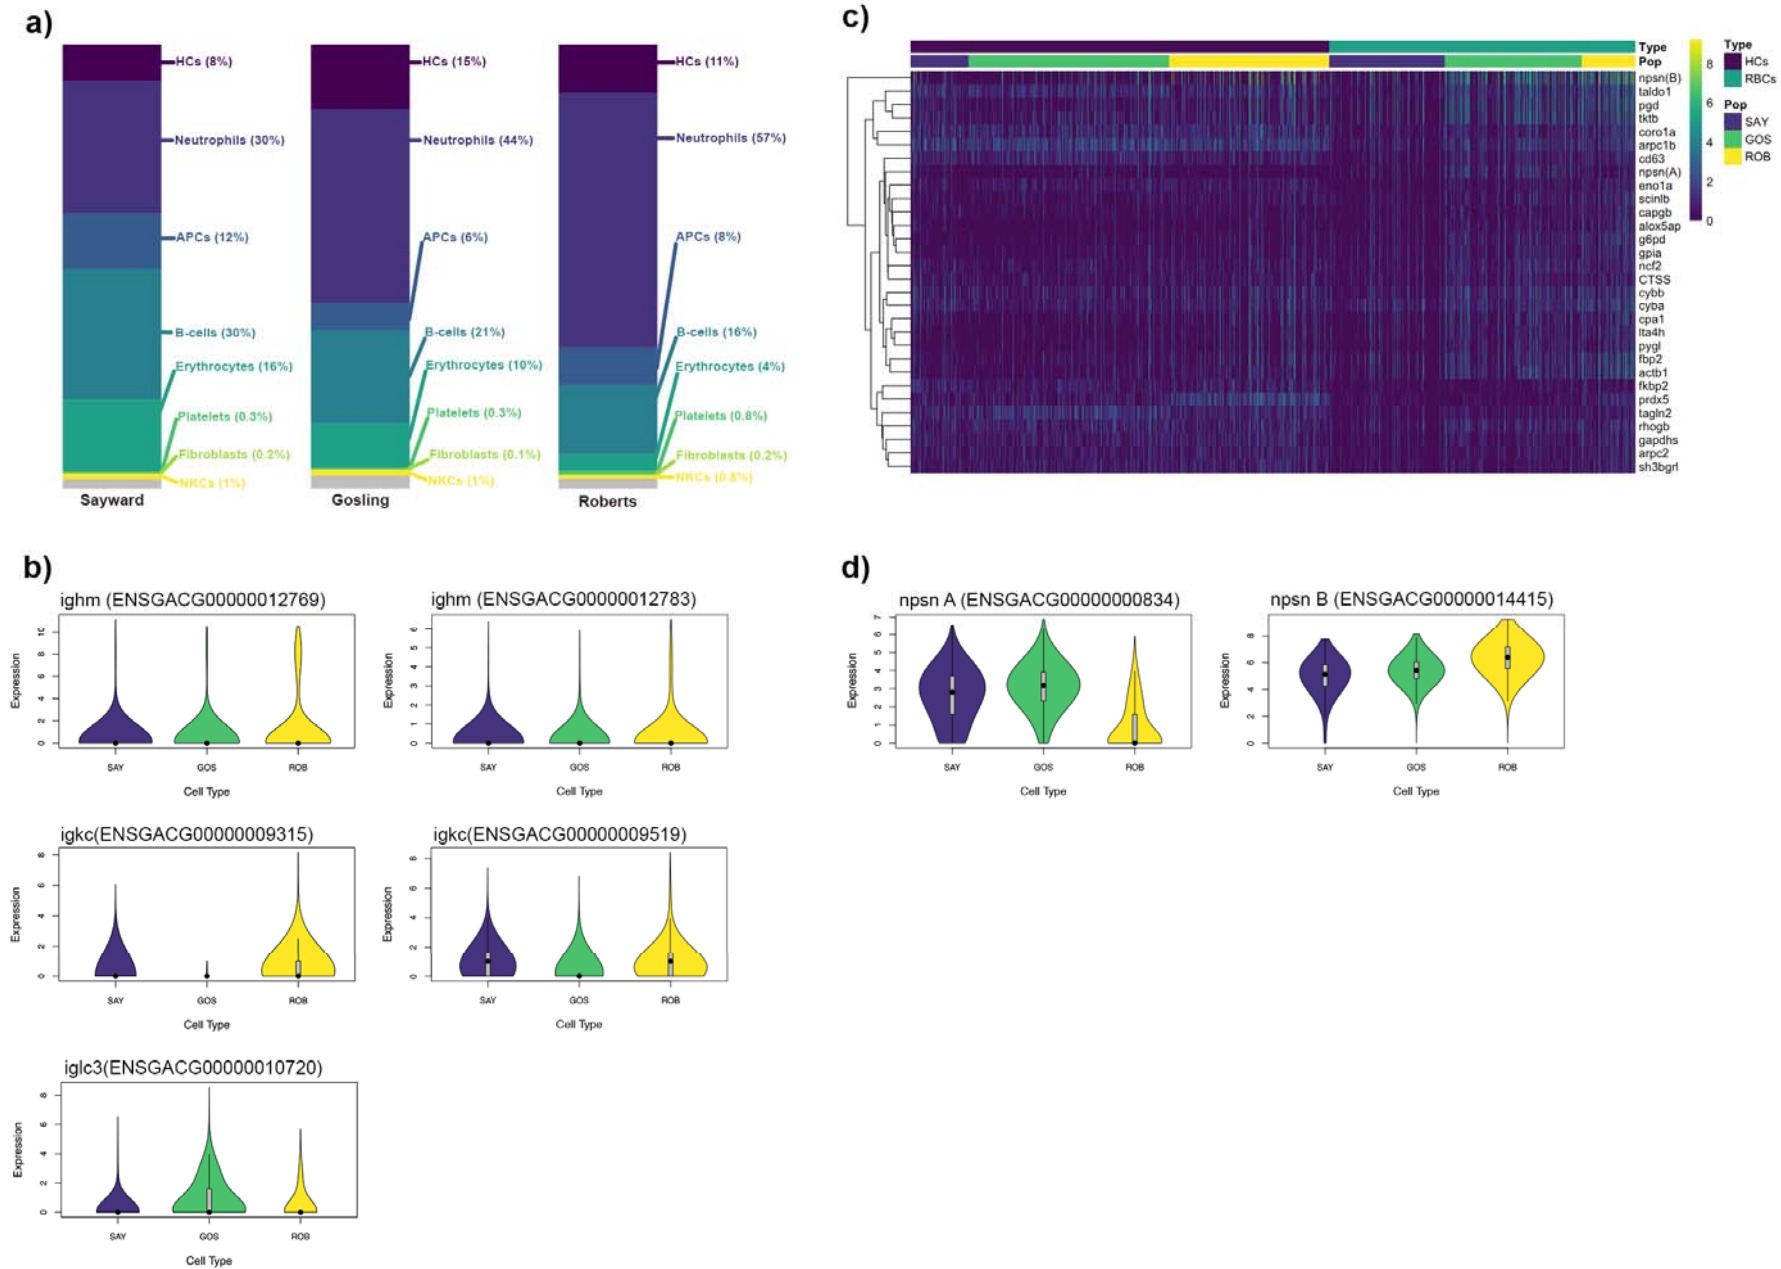

**Figure 3:** Summary of variation in immune cell subtype abundance and expression across three sampled populations of *G. aculeatus*. **a)** bar graph representing relative abundance of each of the eight major cell types within each of the three sampled populations. **b)** comparison across populations of expression of B-cell specific expression of putative immunoglobulin genes. All three genes were significantly differentially expressed between two or more populations. \* indicates significantly different values. **c)** heatmap of expression of neutrophil marker genes in both the hematopoietic cells and erythrocytes. Columns are clustered by cell type and then population. Genes are clustered by similarity of expression profile using base algorithms from the pheatmap package in R, **d)** comparison of neutrophil-specific expression of the two copies of nephrosin across the three sampled populations. \* indicates significantly different values

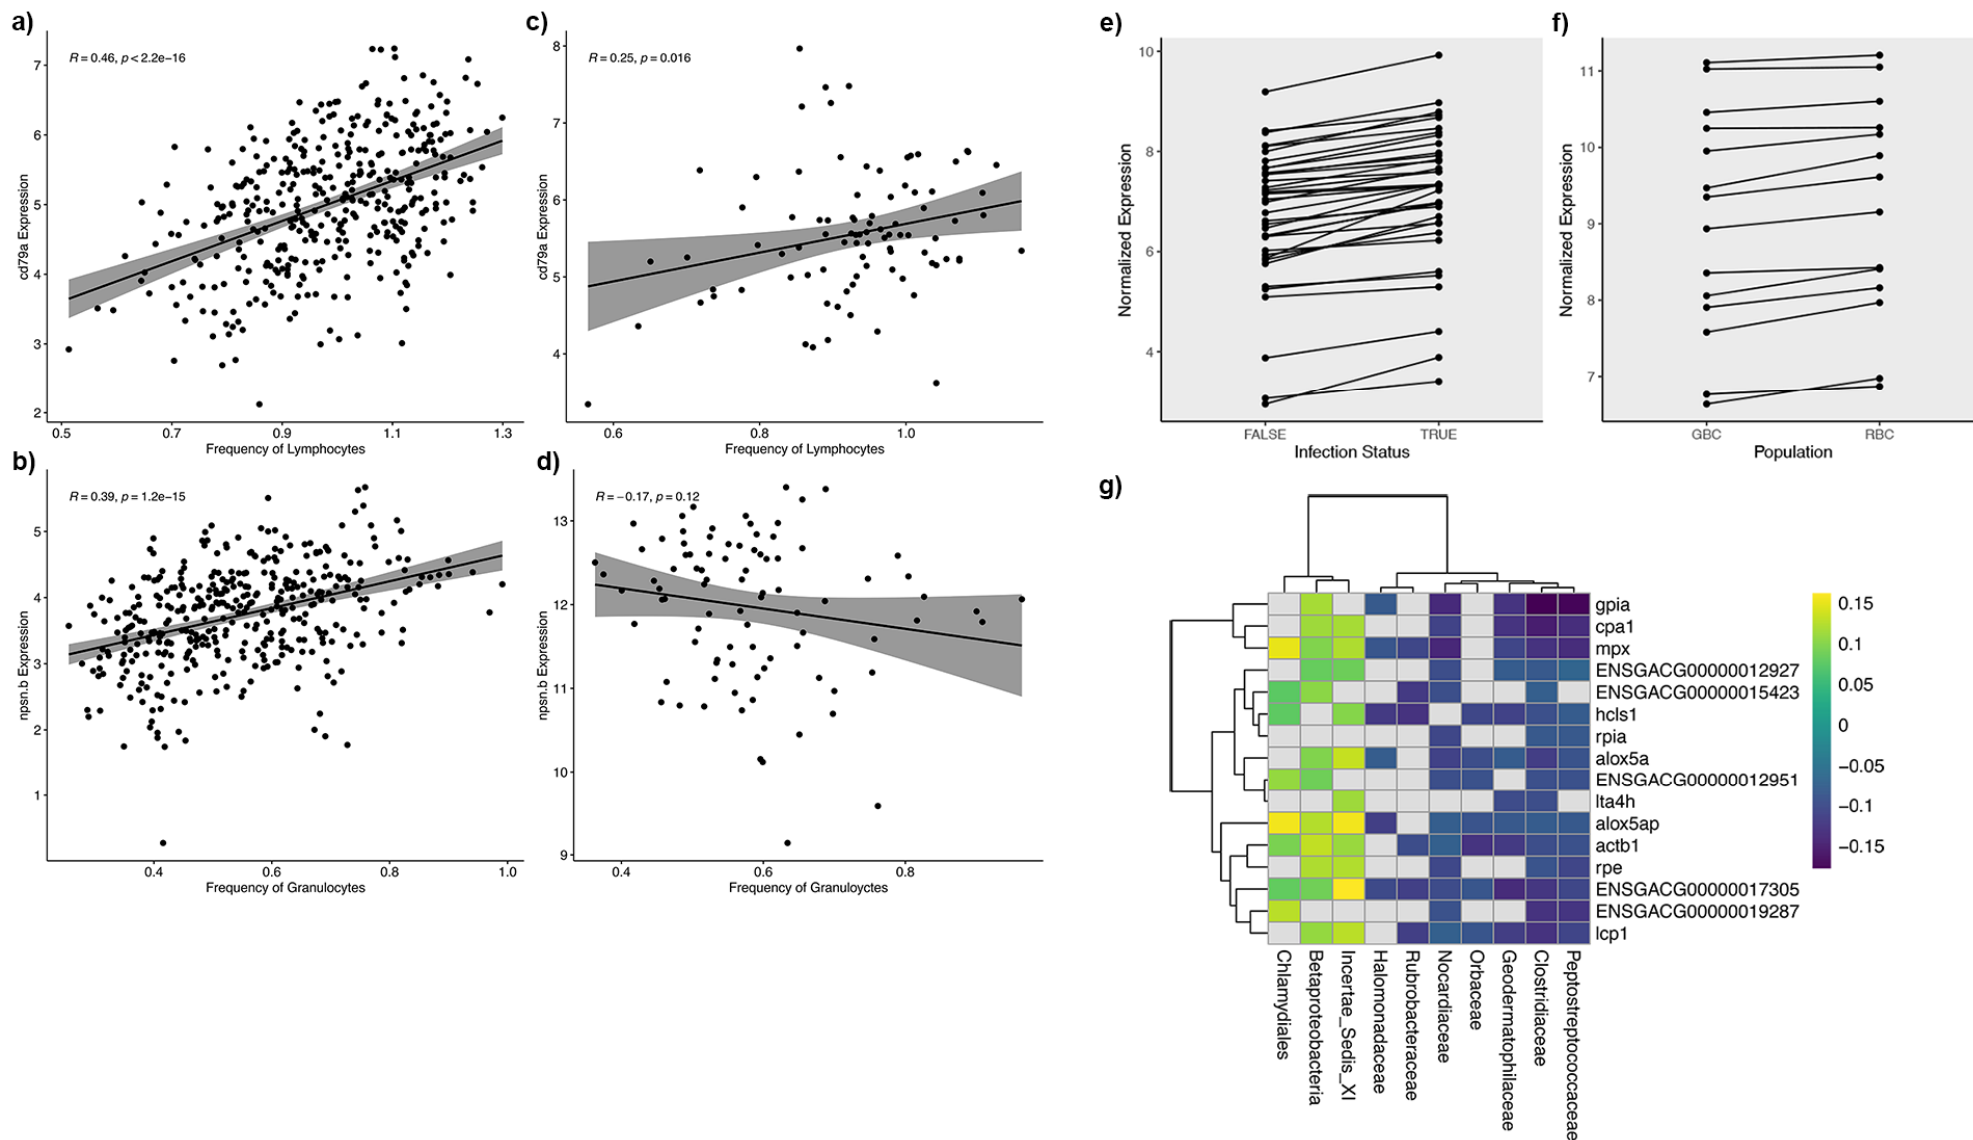

**Figure 4:** Evaluation of applicability of identified markers to past traditional RNAseq datasets **a-d)** Pearson correlations between expression of identified lymphocyte (*cd79a*) or granulocyte markers (*npsn.b*) and normalized lymphocyte or granulocyte frequency (detected by flow cytometry) in our two previous transcriptomic studies sets (**a-b**; (1), (**c-d**; (2, 3). For all correlation plots regression line is shown in black and shading indicates 95% confidence intervals. **e)** patterns of differences in gene expression of identified APC in uninfected vs. infected fish (**f)** patterns of differences in gene expression of identified B-cell markers in parasite susceptible (GBC) vs. parasite resistance (RBC) fish; all data shown in **e-f** corresponds to genes which were significantly differentially expressed in a previous traditional RNAseq study (**REF**). **g)** heatmap of significant correlations (tau) between gene expression of identified neutrophil markers and abundance of specific microbial taxa. Non-significant correlations are displayed in grey. Data taken from a previous correlative analysis of traditional RNAseq data (11).

a)

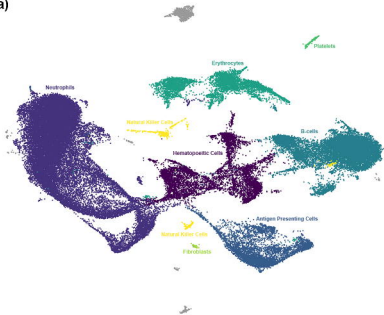

b)

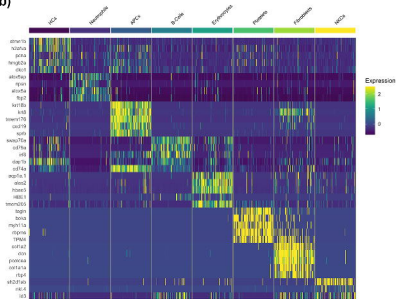

a)

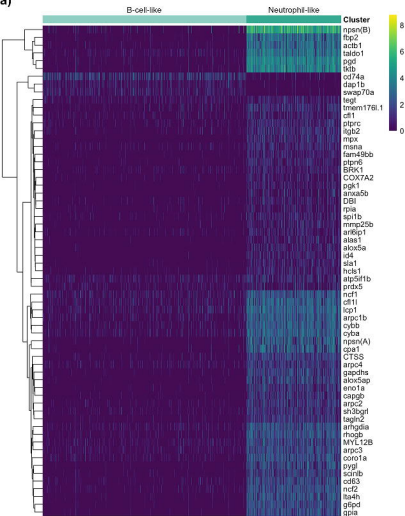

b)

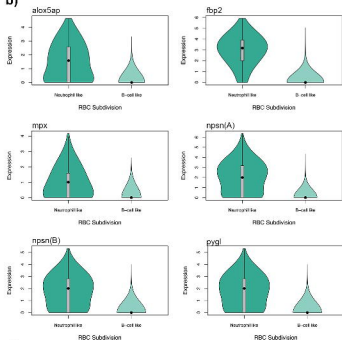

c)

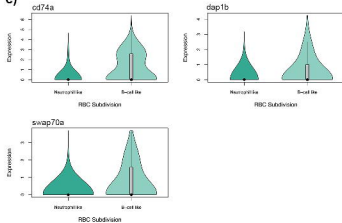

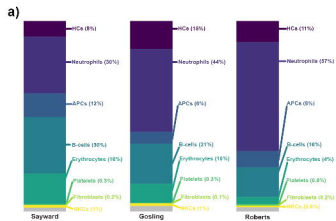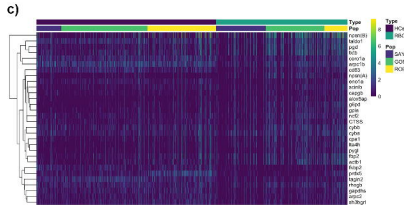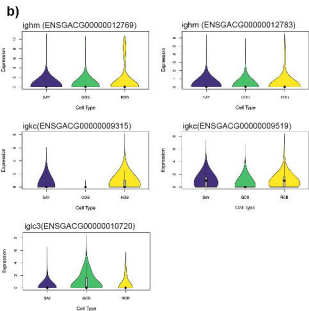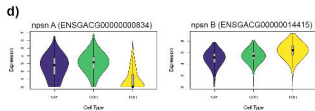



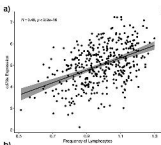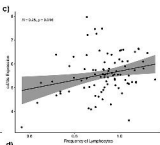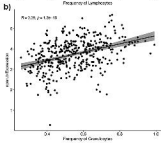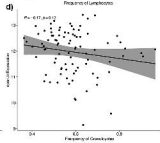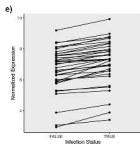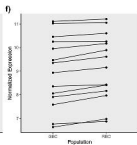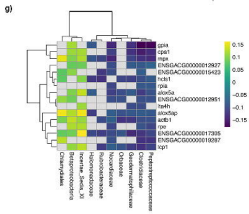

Source: https://www.biorxiv.org/content/10.1101/2021.12.20.473470v1.full.pdf
